# Supplementary material
Source: publisher figshare collection journal article supplement (https://sage.figshare.com/ndownloader/files/17709947)
Supplement: Supplementary file 1 [file 17709947]

## PEGylated Chitosan and PEGylated PLCL for Blood Vessel Repair: An In Vitro Study

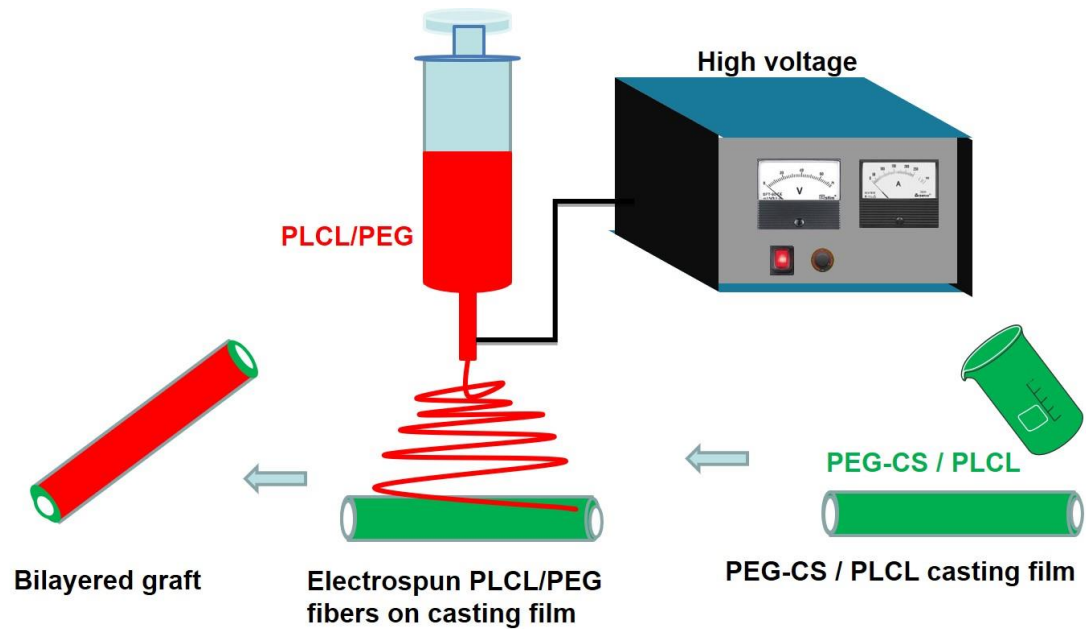

Figure.1 Schematic diagram of fabrication bilayered small-diameter vascular graft.

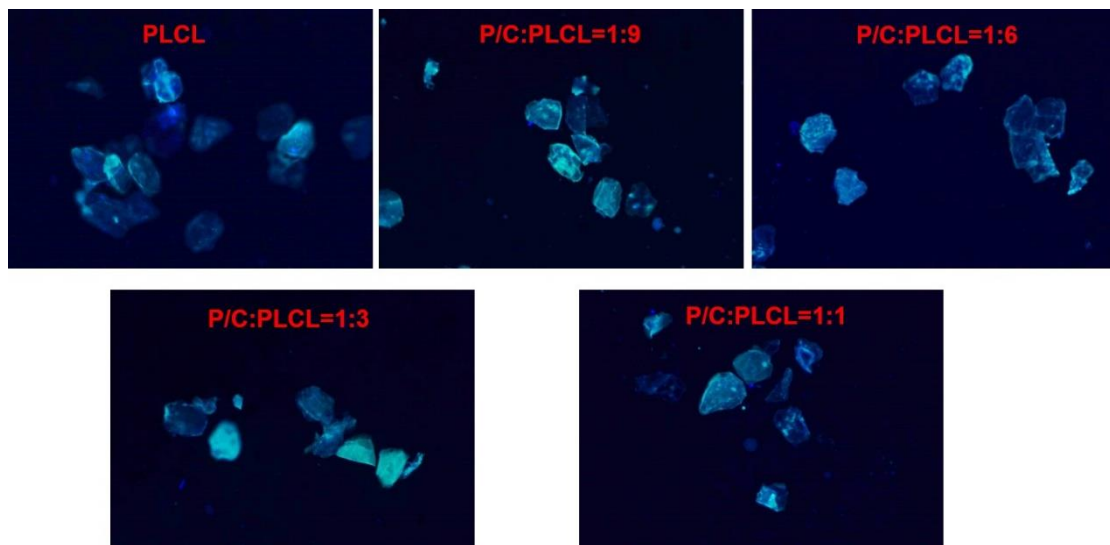

Figure.2 Endothelial cells proliferation at 12 hours. Proliferative cell nuclei are stained by PCNA (green), and cell nuclei are also stained by DAPI (blue).
